# Supplementary material
Source: publisher figshare collection journal article supplement (https://acs.figshare.com/ndownloader/files/4125832)
Supplement: Supplementary file 1 [file 4125832]

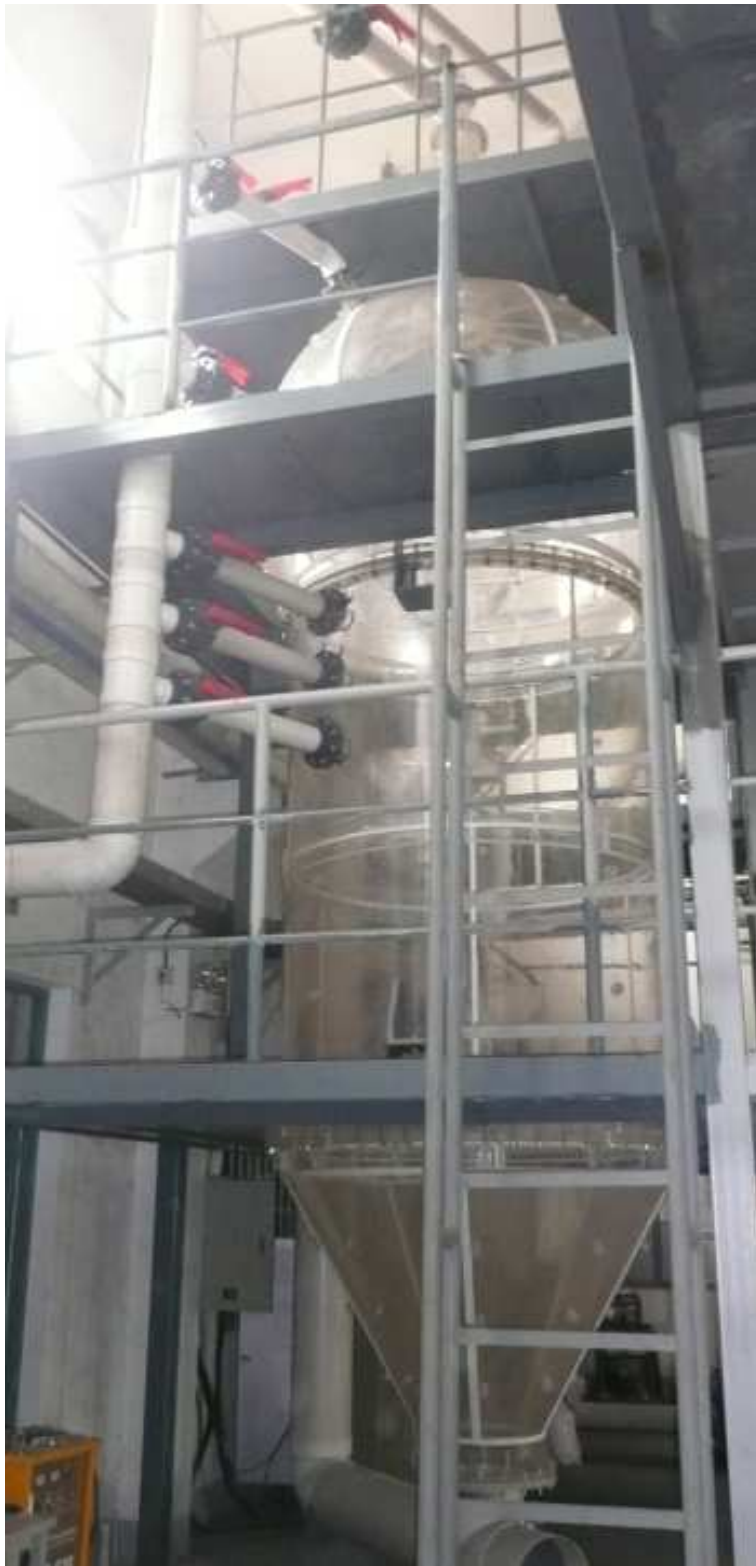

(a) Full body

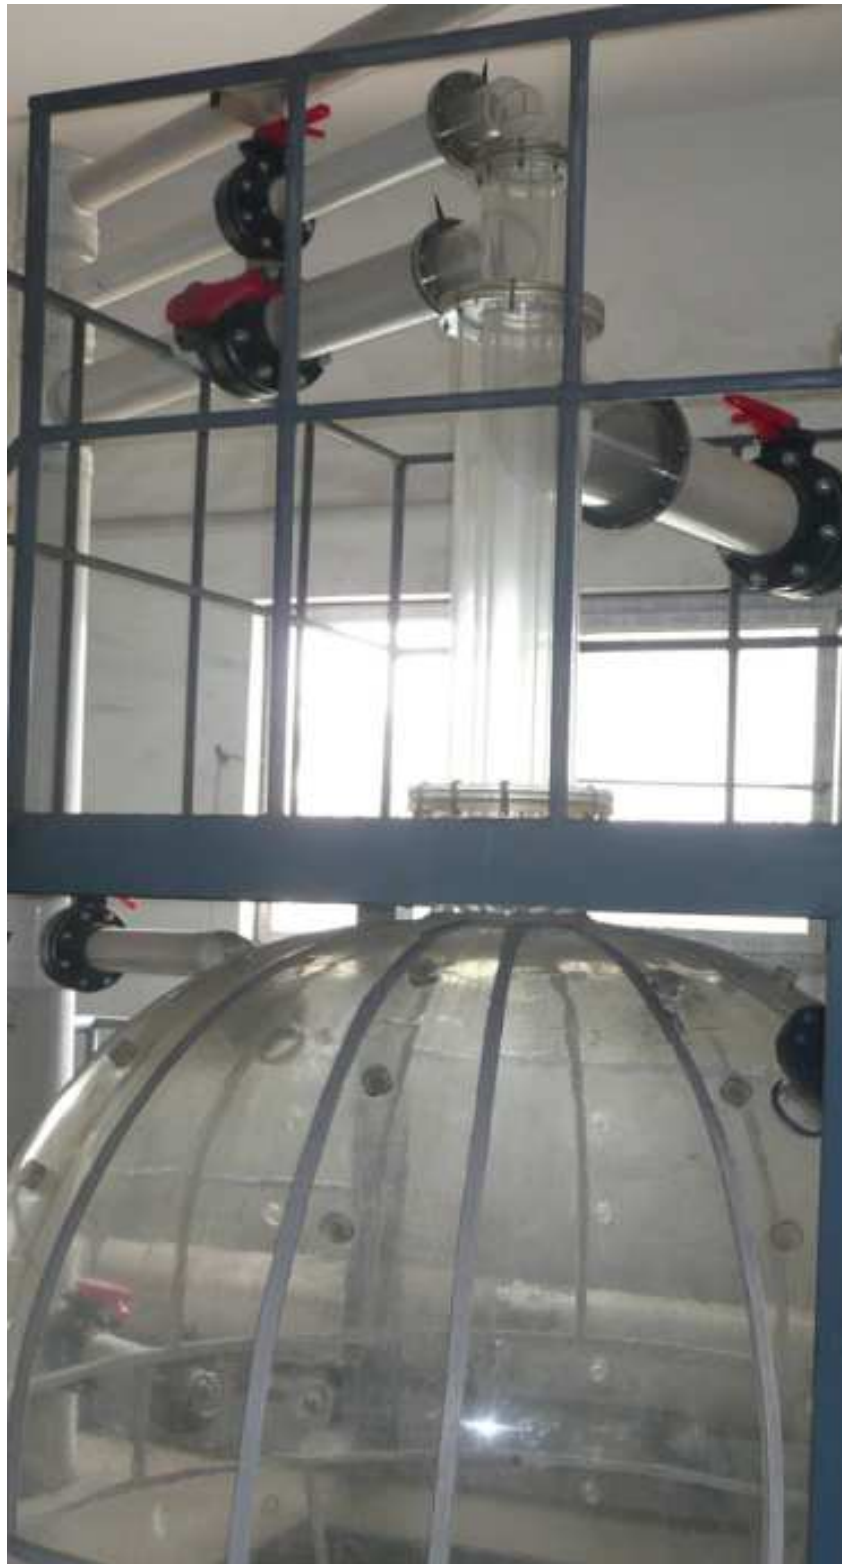

(b) Primary nozzle

Figure 1 Cold test-bench picture of entrained flow gasifier by two stage oxygen

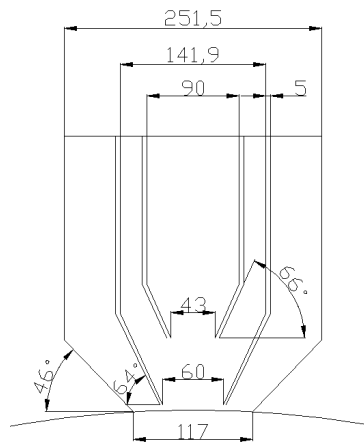

Figure 2 Size parameters of primary nozzle

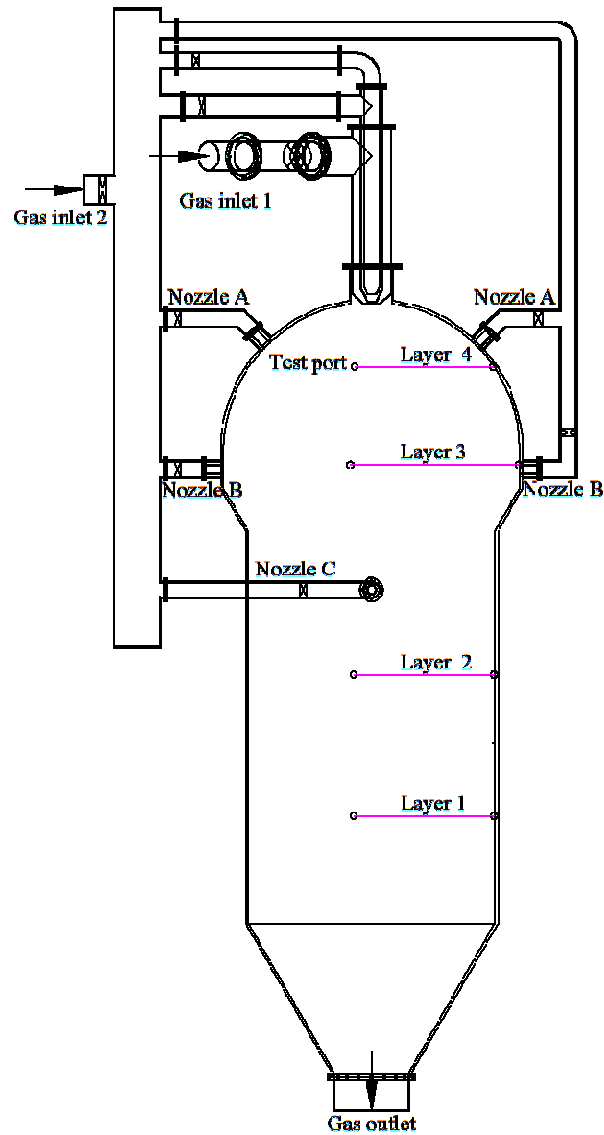

Figure 3. Schematic of the 500t/d pressurized entrained-flow gasifier by two-stage oxygen.
